# Supplementary material for: Predicting Cancer Tissue-of-Origin by a Machine Learning Method Using DNA Somatic Mutation Data
Source: PubMed Central journal article supplement (PMC7372518; doi:10.3389/fgene.2020.00674), 2020-07-14
Supplement: Data_Sheet_1.pdf [file Data_Sheet_1.pdf]

# TOOme: a novel computational framework to infer cancer tissue-of-origin by integrating both gene mutation and expression

Binsheng He<sup>1</sup>, Jidong Lang<sup>2</sup>, Bo Wang<sup>2</sup>, Xiaojun Liu<sup>2</sup>, Qingqing Lu<sup>2\*</sup>, Jianjun He<sup>1</sup>, Wei Gao<sup>3</sup>, Pingping Bing<sup>1</sup>, Geng Tian<sup>2</sup>, Jialiang Yang<sup>2</sup>

<sup>1</sup>Changsha Medical University, China, <sup>2</sup>Geneis (Beijing) Co. Ltd, China, <sup>3</sup>Fujian Provincial Cancer Hospital, China

*Submitted to Journal:*  
Frontiers in Bioengineering and Biotechnology

*Specialty Section:*  
Bioinformatics and Computational Biology

*Article type:*  
Original Research Article

*Manuscript ID:*  
536281

*Received on:*  
19 Feb 2020

*Revised on:*  
29 Mar 2020

*Frontiers website link:*  
[www.frontiersin.org](http://www.frontiersin.org)

---

### *Conflict of interest statement*

The authors declare that the research was conducted in the absence of any commercial or financial relationships that could be construed as a potential conflict of interest

### *Author contribution statement*

JY, GT and PB conceived the concept of the work. BH, XL, BW and JL performed the experiments. BH and XL wrote the paper. QL, WG and JH reviewed the paper. All authors approved the final version of this manuscript.

### *Keywords*

tissue-of-origin, somatic mutation, Gene Expression, random forest, Cross-validation

### *Abstract*

Word count: 343

Metastatic cancers require further diagnosis to determine their primary tumor sites. However, the tissue-of-origin for around 5% tumors could not be identified by routine medical diagnosis according to a statistics in the United States.

With the development of machine learning techniques and the accumulation of big cancer data from TCGA and GEO, it is now feasible to predict cancer tissue-of-origin by computational tools. Metastatic tumor inherits characteristics from its tissue-of-origin, and both gene expression profile and somatic mutation have tissue specificity. Thus, we developed a computational framework to infer tumor tissue-of-origin by integrating both gene mutation and expression (TOOme). Specifically, we first perform feature selection on both gene expressions and mutations by a random forest method. The selected features are then used to build up a multi-label classification model to infer cancer tissue-of-origin. We adopt a few popular multiple-label classification methods, which are compared by the 10-fold cross validation process.

We applied TOOme to the TCGA data containing 7,008 non-metastatic samples across 20 solid tumors. 74 genes by gene expression profile and 6 genes by gene mutation are selected by the random forest process, which can be divided into two categories: (1) cancer type specific genes and (2) those expressed or mutated in several cancers with different levels of expression or mutation rates. Function analysis indicates that the selected genes are significantly enriched in gland development, urogenital system development, hormone metabolic process, thyroid hormone generation prostate hormone generation and so on. According to the multiple-label classification method, random forest performs the best with a 10-fold cross-validation prediction accuracy of 96%. We also use the 19 metastatic samples from TCGA and 256 cancer samples downloaded from GEO as independent testing data, for which TOOme achieves a prediction accuracy of 89%. The cross-validation validation accuracy is better than those using gene expression (i.e., 95%) and gene mutation (53%) alone.

In conclusion, TOOme provides a quick yet accurate alternative to traditional medical methods in inferring cancer tissue-of-origin. In addition, the methods combining somatic mutation and gene expressions outperform those using gene expression or mutation alone.

### *Contribution to the field*

Metastatic cancers require further diagnosis to determine their primary tumor sites. However, the tissue-of-origin for around 5% tumors could not be identified by routine medical diagnosis according to a statistics in the United States. With the development of machine learning techniques and the accumulation of big cancer data from TCGA and GEO, it is now feasible to predict cancer tissue-of-origin by computational tools. Metastatic tumor inherits characteristics from its tissue-of-origin, and both gene expression profile and somatic mutation have tissue specificity. Thus, we developed a computational framework to infer tumor tissue-of-origin by integrating both gene mutation and expression (TOOme). TOOme provides a quick yet accurate alternative to traditional medical methods in inferring cancer tissue-of-origin. In addition, the methods combining somatic mutation and gene expressions outperform those using gene expression or mutation alone.

*Ethics statements*

*Studies involving animal subjects*

Generated Statement: No animal studies are presented in this manuscript.

*Studies involving human subjects*

Generated Statement: No human studies are presented in this manuscript.

*Inclusion of identifiable human data*

Generated Statement: No potentially identifiable human images or data is presented in this study.

In review

*Data availability statement*

Generated Statement: Publicly available datasets were analyzed in this study. This data can be found here: [https://dcc.icgc.org/releases/release\\_26/](https://dcc.icgc.org/releases/release_26/), [https://dcc.icgc.org/releases/release\\_28/](https://dcc.icgc.org/releases/release_28/).

In review

# TOOme: a novel computational framework to infer cancer tissue-of-origin by integrating both gene mutation and expression

1 **Binsheng He<sup>1,#,\*</sup>, Jidong Lang<sup>2,#</sup>, Bo Wang<sup>2</sup>, Xiaojun Liu<sup>2</sup>, Qingqing Lu<sup>2</sup>, Jianjun He<sup>1</sup>, Wei**  
2 **Gao<sup>3</sup>, Pingping Bing<sup>1,\*</sup>, Geng Tian<sup>2,\*</sup>, Jialiang Yang<sup>2,\*</sup>**

3  
4 <sup>1</sup> Academician Workstation, Changsha Medical University, Changsha 410219, China

5 <sup>2</sup> Genies Beijing Co., Ltd., Beijing 100102, China.

6 <sup>3</sup> Fujian Provincial Cancer Hospital, Fuzhou 350011, China

7  
8 # These authors contributed equally to this study

9 **\*Correspondence:**

10 Corresponding Author

11 hbcsmu@163.com

12 bpping@163.com

13 tiang@geneis.cn

14 yangjl@geneis.cn

15 **Keywords: tissue-of-origin; somatic mutation; gene expression; random forest;**  
16 **cross-validation**

17 **Abstract**

18 Metastatic cancers require further diagnosis to determine their primary tumor sites. However, the  
19 tissue-of-origin for around 5% tumors could not be identified by routine medical diagnosis according to a  
20 statistics in the United States.

21 With the development of machine learning techniques and the accumulation of big cancer data from  
22 The Cancer Genome Atlas(TCGA) and Gene Expression Omnibus(GEO), it is now feasible to predict  
23 cancer tissue-of-origin by computational tools. Metastatic tumor inherits characteristics from its  
24 tissue-of-origin, and both gene expression profile and somatic mutation have tissue specificity. Thus, we  
25 developed a computational framework to infer tumor tissue-of-origin by integrating both gene mutation  
26 and expression (TOOme). Specifically, we first perform feature selection on both gene expressions and  
27 mutations by a random forest method. The selected features are then used to build up a multi-label  
28 classification model to infer cancer tissue-of-origin. We adopt a few popular multiple-label classification

29 methods , which are compared by the 10-fold cross validation process.

30 We applied TOOme to the TCGA data containing 7,008 non-metastatic samples across 20 solid  
31 tumors. 74 genes by gene expression profile and 6 genes by gene mutation are selected by the random  
32 forest process, which can be divided into two categories: (1) cancer type specific genes and (2) those  
33 expressed or mutated in several cancers with different levels of expression or mutation rates. Function  
34 analysis indicates that the selected genes are significantly enriched in gland development, urogenital  
35 system development, hormone metabolic process, thyroid hormone generation prostate hormone  
36 generation and so on. According to the multiple-label classification method, random forest performs the  
37 best with a 10-fold cross-validation prediction accuracy of 96%. We also use the 19 metastatic samples  
38 from TCGA and 256 cancer samples downloaded from GEO as independent testing data, for which  
39 TOOme achieves a prediction accuracy of 89%. The cross-validation validation accuracy is better than  
40 those using gene expression (i.e., 95%) and gene mutation (53%) alone.

41 In conclusion, TOOme provides a quick yet accurate alternative to traditional medical methods in  
42 inferring cancer tissue-of-origin. In addition, the methods combining somatic mutation and gene  
43 expressions outperform those using gene expression or mutation alone.

## 44 45 **Introduction**

46 Metastatic cancer is a common clinical challenge for limited evidence to determine its primary origin.  
47 Patients with carcinoma of unknown primary (CUP) account for about 5% of total cancer patients[1]. CUP  
48 are usually heterogeneous, and can lead to dilemmas in diagnosing and treatment since the original tumor  
49 site is unknown [2]. Clinically, CUP patients are generally treated with non-selective empirical  
50 chemotherapy, which usually leads to low survival rates [3]. Thus, identifying cancer tissue-of-origin  
51 (TOO) is critical in improving the treatment of cancer patients and extending their surviving time [4-6].

52 There are several ancillary examinations in CUP identification, among which immunohistochemistry  
53 (IHC) is an important one. However, this method relies on the experiences of pathologists and is  
54 labor-intensive. As a result, it is inaccurate in most of the times[7-11]. Positron emission tomography (PET)  
55 and computed tomography (CT) are also commonly used in the identification of CUP[12-14]. The  
56 detection rate of conventional radiological imaging on primary carcinoma reach 20%–27%, and that of  
57 PET reach 24%–40% [15]. The detection accuracy of PET/CT is awfully low that it rarely brings help to  
58 identify the primary origin. Obstacles in image technology cause much difficulty of effective use of

59 relative Carcinoma image to help tracing cancer tissue origin.

60 Molecular profiling of tissue-specific genes is also being used in CUP work-up. Quantities of  
61 large-scale profiles of different tumors have been used for diagnose. Molecular profiling is as well as or  
62 better than IHC, in terms of poorly differentiated or undifferentiated tumors [16]. Therefore, making use of  
63 molecular profiling has become a popular way for diagnosis of unknown origin. Comprehensive molecular  
64 profiles displayed in The Cancer Genome Atlas (TCGA) including copy number variation, somatic  
65 mutation, gene expression, microRNA expression, DNA methylation, and protein expression, are used to  
66 identifying human tumor types [17]. By analysis of tumor types from data of methylation and copy number  
67 variation, tissue of origin and molecular classification can be revealed [18]. The methylation profile of  
68 metastasis in a meningeal melanocytic tumor is similar to that of primary tumor, and it is suggest that  
69 particular copy number variations may be associated with metastatic behavior [19]. Methylation and copy  
70 number variation are DNA-level molecular profiling, which brought great help to identify tumor origins.

71 The copy number profile and gain or loss in specific chromosome regions have been researched by  
72 hybridization and cytogenetic-based methods [20, 21]. An *IDH1* somatic mutation in genomic profiling  
73 was revealed to bring great benefit to the diagnosis of cholangiocarcinoma and trace the primary origin in  
74 a malignancy[22]. Marquard *et al.* obtained classification accuracy of 69% and 85% on 6 and 10 primary  
75 sited with somatic mutation respectively, based on PM and CN classifier(classifiers with both point  
76 mutations and copy number aberrations) with cross-validation[23]. Mutation of tumor-specific enrichment  
77 in certain genes, has been utilized to infer tumor localization, and Dietlein & Eschner developed a tool  
78 with mutation spectra to infer cancer origins with a prediction specificity of 79% [24, 25]. As a DNA-level  
79 molecular profiling, SNP, that is somatic mutation, can be used as a very useful tool to infer the tissue of  
80 origins.

81 A lot of RNA-level gene expression profile have been explored to identify the cancer tissue of origin  
82 [26-30]. Erlander et al, have demonstrated that the gene expression value of samples detected in metastatic  
83 tumor is similar to that in the original tumor under condition of carcinoma of unknown primary [31].  
84 Centeno et al, developed a hybrid model by integrating expression profiling and immunohistochemistry for  
85 microRNA-based qRT-PCR test on identification of cancer tissue origin, with 85% of the cases  
86 correctly identified [32]. Bloom, G et al, utilized artificial neural networks (ANNs) to predict the unknown  
87 cancer tissue origin with mean accuracy of 83-88% in different platforms[33].

88 Numerous researches have utilized molecular profiles, such as copy number variation, somatic

89 mutation, gene expression, and so on for predicting cancer tissue origin. However, the accuracy of  
90 prediction was not satisfying. Identifying cancer tissue origin by combining somatic mutation and gene  
91 expression profiling on DNA level and RNA level respectively is first proposed in this study. Firstly, we  
92 obtained the data of somatic mutation and gene expression profiling from International Cancer Genome  
93 Consortium(ICGC) Database. Machine learning methods can help to improve the performance on  
94 prediction of cancer tissue origin. We aim to obtain better performance in predicting cancer tissue origin,  
95 by the combination of somatic mutation and gene expression profiling, based on random forest. Machine  
96 learning algorithm, such as logistic regression can be used to select gene [34]. However, random forest  
97 algorithm [35] was chosen as the gene selection algorithm in this study due to its advantage, good  
98 robustness and easy to use. Finally, we used random forest algorithm for classification of cancers.  
99 Experiment results showed that higher accuracy can be obtained by using the method proposed in this  
100 study.

## 101 **Materials and methods**

### 102 **Gene expression data**

103 Gene expression profile was downloaded from ICGC Database version release-26  
104 ([https://dcc.icgc.org/releases/release\\_26/](https://dcc.icgc.org/releases/release_26/)). Each gene is named by Gene Symbol ID. The value of gene  
105 expression in each labeled sample is normalized by TPM. After deduplication, samples were extracted for  
106 combination with SNP samples.

### 107 **Somatic mutation data**

108 The somatic mutation data was downloaded from ICGC Database version release-28  
109 ([https://dcc.icgc.org/releases/release\\_28/](https://dcc.icgc.org/releases/release_28/)). Each gene is named by Ensembl Gene ID. For Gene Symbol ID  
110 is most widely used in paper, the Ensembl Gene ID of gene name in somatic mutation data was converted  
111 to Gene Symbol ID. The samples are deduplicated according to information of ICGC-donor-ID,  
112 chromosome, and locus in chromosome and gene-affected. Each sample was labeled by its type of cancer.

### 113 **Data combination**

114 The gene expression and somatic mutation data were merged into one feature matrix. For labeled samples



115 with gene expression array data only involves in 21 cancer types, and samples with Skin Cutaneous  
 116 Melanoma(SKCM) were removed for it contributes to the major metastasis cancers. The sample with  
 117 somatic mutation data whose label was not included in these 20 cancer types was removed. Then, the  
 118 shared sample data was chosen, therefore the samples data after filtering is obtained from 20 different  
 119 cancer types. An M\*N matrix was generated, where M and N represents the number of sample and gene  
 120 respectively.

## 121 **Gene selection**

122 Because gene sequencing and mutation detection are costly and time consuming, a scale reduction of gene  
 123 number is necessary. There are many feature selection algorithms, like Lasso, PCA [36, 37] and etc. The  
 124 Random forest [35, 38] was a supervised learning algorithm, which is an ensemble learning algorithm  
 125 based on decision tree and was used to select genes. Best performance was obtained by using 80 selected  
 126 genes.  $\sqrt{n}$  genes were used in a tree, where n represents the number of genes. At the process of splitting  
 127 node, Gini index was used, which is calculated by formula:

$$128 \text{Gini}(p) = \sum_{k=1}^K p_k (1 - p_k) = 1 - \sum_{k=1}^K p_k^2 \quad (1)$$

129  
 130  
 131 Where  $p$  represents the weight referring to frequencies of cancers in a node,  $k$  represents the number of  
 132 cancers and  $p_k$  represents the weight of the  $k$ th cancer. The variable importance measures of  $i$ th gene  
 133 in node  $m$ , that is the Gini index variation after splitting of node  $m$ , is calculated by formula:

$$134 \text{VIM}_{im}^{(Gini)} = GI_m - GI_l - GI_r \quad (2)$$

135  
 136 Where  $m$  is a node in  $M$ , which is a set of nodes,  $\text{VIM}_{im}^{(Gini)}$  represents variable importance measures of  
 137  $i$ th gene in node  $m$ , the  $GI_m$  represents the Gini index before splitting,  $GI_l$  and  $GI_r$  represents the  
 138 Gini index of two new node after splitting respectively. The importance of the  $i$ th gene, in the  $t$ th tree is  
 139 calculated by formula:

$$140 \text{VIM}_{ti}^{(Gini)} = \sum_{m \in M} \text{VIM}_{im}^{(Gini)} \quad (3)$$

141 Where  $\text{VIM}_{ti}^{(Gini)}$  represents the importance of the  $i$ th gene in the  $t$ th tree. If the set of trees is  $T$ , the  
 142 importance of the  $i$ th gene in all the tree is calculated by formula:

143 
$$VIM_i^{(Gini)} = \sum_{t=1}^T VIM_{ti}^{(Gini)} \quad (4)$$

144 Where  $VIM_i^{(Gini)}$  is the importance of the  $i$ th gene in all trees. We sorted the importance scores of all  
145 genes, then the top  $H$  genes were selected, where  $H$  is the variable number of genes that can be set to  
146 find the best result.

### 147 **Multi-classifier Random Forest**

148 The random forest is actually a special method of bagging that using the decision tree as a model in  
149 bagging[38, 39]. First, the bootstrap method is used to generate  $m$  training sets, which is a set of samples.  
150 Then, each training set is used to construct a tree.  $\sqrt{n}$  genes are used in a tree, where  $n$  represents the  
151 number of selected genes. When splitting a node, not all the genes are used to optimize the metric Gini  
152 index used in this study, a part of genes is randomly extracted instead. An optimal solution can be found  
153 among the extracted genes, and applied to node splitting. Leaf node in the tree records which gene is used  
154 to determine the cancer type, and each leaf node represents the last judged cancer type. The predicted  
155 cancer type is given by maximum votes from decision tree.

### 156 **Statistical Analysis**

157 The metric of precision, recall and F1 score were used to evaluate the performance of the model.  
158 True-positive, false-positive, true-negative and false-negative are abbreviated as TP, FP, TN and FN  
159 respectively. Precision is calculated by  $(TP)/(TP + FP)$ , which indicates the ability of classifier to  
160 differentiate positive from negative cases. Recall is calculated by  $(TP)/(TP + FN)$ , which indicates the  
161 ability of classifier to recognize all positive cases. The  $F1$  score is calculated  
162 by  $(2 * recall * precision)/(recall + precision)$ . Each individual cancer type is calculated by these  
163 metrics, and the cohort metric adopt the mean report. The entire cohort is calculated by accuracy, reported  
164 as  $(TP + TN)/(total\ cases)$ . 10 times 10-fold cross validation is used to obtain the metric report, whose  
165 average is treated as the result metric.

### 166 **Gene annotation**

167 The functions annotation of specific gene set was given. Geno ontology [40, 41] was used as enrichment  
168 analysis database. Gene clustering and visualization was realized by R package cluaterProfiler and

170 **Results**

171 **The workflow of TOOme**

172 The complete workflow of prediction on cancer tissue origin is shown in Fig 1. The process can be split  
 173 into three steps. At the first step, we download the raw data from ICGC Database, and extracted the  
 174 effective information to obtain preliminary data of somatic mutation and gene expression profiling. At the  
 175 second step, we filtered the data of somatic mutation and gene expression profiling respectively. Then,  
 176 samples with both somatic mutation data and gene expression proofing were used to form feature matrix.  
 177 As a result, the generated feature matrix was used for gene selection. At the third step, most of the samples  
 178 were utilized to train the model with 10-time 10 folds cross validation by using random forest  
 179 classification algorithm. We carried out numerous experiments to evaluate the performance of the  
 180 proposed method.

181

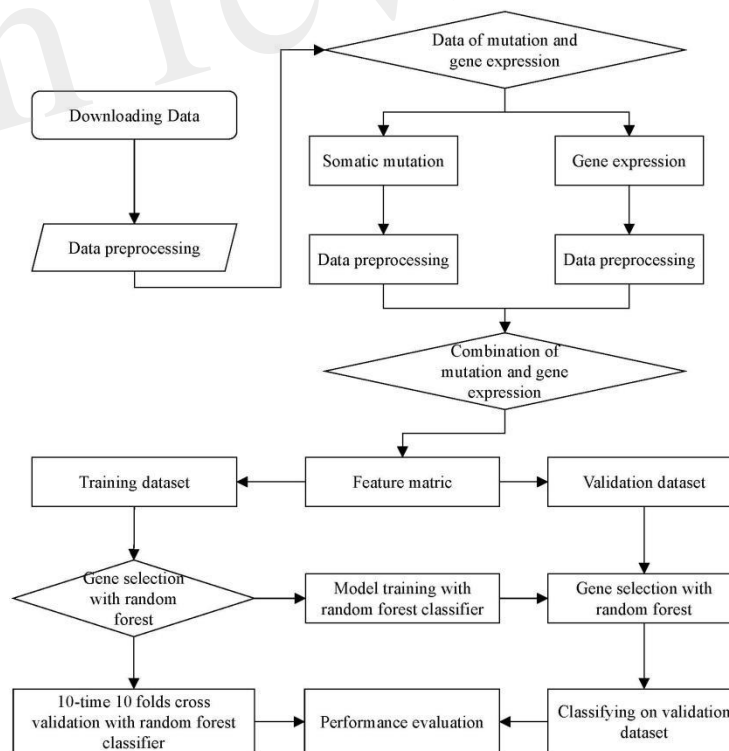

182

183 **Fig 1.** The complete workflow of prediction on cancer tissue origin.

184

185 **Data used in this study**

186 We used ICGC version 26 and 28 databases, with Gene expression profile and somatic mutation  
 187 information to classify tumor samples. The allele mutation in somatic mutation data can be A/G, C/T, C/A  
 188 and etc. For it is hard to distinguish mutation types with limited relative information and tools, we consider  
 189 all kinds of allele mutation as gene mutation and count the number of gene mutation of each sample.  
 190 Different from somatic mutation data, Gene expression profile array data is directly used. The sample  
 191 distribution of each cancer is showed in Table 1, where samples suffer from BRCA are much more than  
 192 from other cancers. Considerable prediction results can be obtained by our model. The precision, recall and  
 193  $F_1$  score, showed in Table 2, reach 99.86%, 99.47% and 99.67% respectively.

194 In this study, there are 371 samples with metastasis, where 352 samples are SKCM. To avoid  
 195 unbalanced distribution of samples, we removed all the SKCM samples with metastasis. Only 19 samples  
 196 with metastasis were used as test dataset.

197

198 **Table 1.** Sample distribution of each cancer from ICGC database.

| Available Cancer Types                                           | Abbreviation | samples |            |
|------------------------------------------------------------------|--------------|---------|------------|
|                                                                  |              | Amount  | Percentage |
| Bladder urothelial carcinoma                                     | BLCA         | 294     | 4.20%      |
| Breast invasive carcinoma                                        | BRCA         | 970     | 13.84%     |
| Cervical squamous cell carcinoma and endocervical adenocarcinoma | CESC         | 241     | 3.44%      |
| Colon adenocarcinoma                                             | COAD         | 390     | 5.57%      |
| Glioblastoma multiforme                                          | GBM          | 148     | 2.11%      |
| Head and Neck squamous cell carcinoma                            | HNSC         | 460     | 6.56%      |
| Kidney renal clear cell carcinoma                                | KIRC         | 345     | 4.92%      |
| Kidney renal papillary cell carcinoma                            | KIRP         | 216     | 3.08%      |
| Acute Myeloid Leukemia                                           | LAML         | 121     | 1.73%      |
| Brain lower grade glioma                                         | LGG          | 433     | 6.18%      |
| Liver hepatocellular carcinoma                                   | LIHC         | 282     | 4.02%      |
| Lung adenocarcinoma                                              | LUAD         | 475     | 6.78%      |
| Lung squamous cell carcinoma                                     | LUSC         | 411     | 5.87%      |
| Ovarian serous cystadenocarcinoma                                | OV           | 185     | 2.64%      |
| Pancreatic adenocarcinoma                                        | PAAD         | 134     | 1.91%      |
| Prostate adenocarcinoma                                          | PRAD         | 374     | 5.34%      |
| Rectum adenocarcinoma                                            | READ         | 137     | 1.95%      |
| Stomach adenocarcinoma                                           | STAD         | 412     | 5.88%      |
| Thyroid carcinoma                                                | THCA         | 486     | 6.93%      |
| Uterine corpus endometrial carcinoma                             | UCEC         | 494     | 7.05%      |
| Total                                                            |              | 7008    | 100%       |

199

## 200 Performance evaluation

201 The classification accuracies obtained by using data of somatic mutation, gene expression profiling and  
202 both of them, under condition of using different number of genes, have been compared in Fig 2. Motivated  
203 by Ma, Patel et al that 5 genes can be used to solve a 32-type classification problem[44], 5 was chosen as  
204 the minimum number of genes. For gene sequencing and mutation detection are costly and time consuming,  
205 120 was chosen as the maximum number of genes. A lot of experiments have been done using the prepared  
206 data between the interval from 5 to 120. For using small number of genes did not obtain satisfying  
207 classification performance, the interval between number of genes was set to 10 or even larger until the  
208 number of genes equals to 50. Then the interval was set to 5 for fine tuning, based on small fluctuation by  
209 changed number of genes.

210 Results with 10-time 10 folds cross validation on training dataset are shown in Fig 2 that accuracy of  
211 using data of both somatic mutation and gene expression profiling is always higher than that of only using  
212 one of it. The best result of them are 95.77%, 53.51% and 89.28%, obtained by using 80, 120 and 105  
213 genes respectively. Results shows that gene expression can make much contribution to obtain higher  
214 accuracy than data of somatic mutation. However, a combination of them achieved best classification  
215 performance.

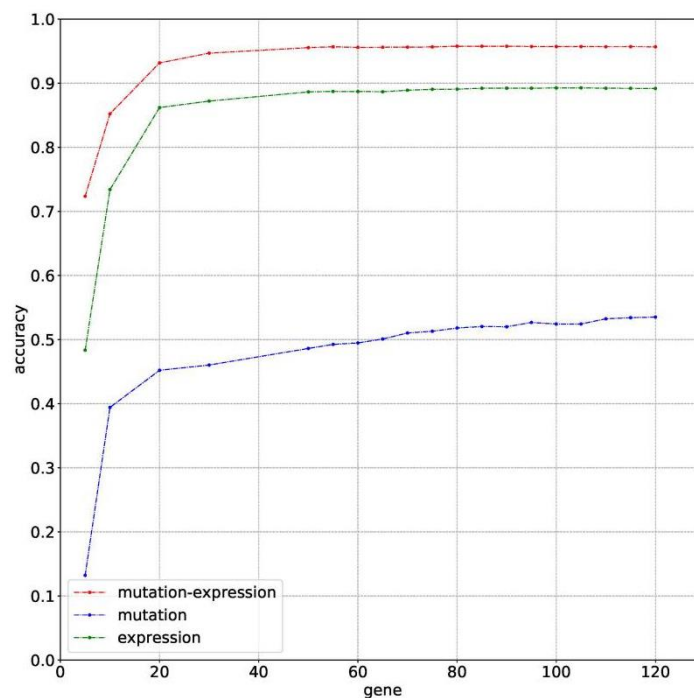

216  
217 **Fig 2.** The classification accuracy of using somatic mutation, gene expression and combination of somatic  
218 mutation and gene expression respectively.

219

220 As for the test dataset, we conducted experiments by using the chosen 80 genes in training model.  
 221 The overall classification accuracy is 89.47%. Table 3 shows the prediction probabilities of each sample on  
 222 each cancer. The value on the table highlighted by color of green, yellow and pink presents high, middle  
 223 and low probabilities respectively of predicting a sample to a cancer type. We obtained considerable  
 224 prediction accuracy on sample with BRCA and THCA. Each sample was correctly predicted to the same as  
 225 the true label. A sample whose true label is CESC was predicted to UCEC. A sample whose true label is  
 226 BRCA was predicted to LGG with a terrible probability 1.65%. In this condition, we considered that little  
 227 error on classification is tolerable.

228

229 **Table 2.** Performance of classification of combination of somatic mutation and gene expression by using  
 230 80 genes.

| Cancer Type     | Precision | Recall | F1-score | Support  | Specificity |
|-----------------|-----------|--------|----------|----------|-------------|
| BLCA            | 0.8906    | 0.9354 | 0.9124   | 294.0000 | 0.9950      |
| BRCA            | 0.9987    | 0.9947 | 0.9967   | 970.0000 | 0.9998      |
| CESC            | 0.9148    | 0.8859 | 0.9001   | 241.0000 | 0.9971      |
| COAD            | 0.7548    | 0.9644 | 0.8468   | 390.0000 | 0.9815      |
| GBM             | 0.9940    | 1.0000 | 0.9970   | 148.0000 | 0.9999      |
| HNSC            | 0.9916    | 1.0000 | 0.9958   | 460.0000 | 0.9994      |
| KIRC            | 0.9850    | 0.9516 | 0.9680   | 345.0000 | 0.9992      |
| KIRP            | 0.9344    | 0.9630 | 0.9485   | 216.0000 | 0.9979      |
| LAML            | 1.0000    | 1.0000 | 1.0000   | 121.0000 | 1.0000      |
| LGG             | 0.9926    | 0.9977 | 0.9952   | 433.0000 | 0.9995      |
| LIHC            | 0.9925    | 0.9844 | 0.9884   | 282.0000 | 0.9997      |
| LUAD            | 0.9358    | 0.9448 | 0.9403   | 475.0000 | 0.9953      |
| LUSC            | 0.9408    | 0.9000 | 0.9199   | 411.0000 | 0.9965      |
| OV              | 1.0000    | 0.9946 | 0.9973   | 185.0000 | 1.0000      |
| PAAD            | 0.9378    | 0.9552 | 0.9464   | 134.0000 | 0.9988      |
| PRAD            | 0.9973    | 1.0000 | 0.9987   | 374.0000 | 0.9998      |
| READ            | 0.7569    | 0.1591 | 0.2627   | 137.0000 | 0.9990      |
| STAD            | 0.9947    | 0.9976 | 0.9961   | 412.0000 | 0.9997      |
| THCA            | 1.0000    | 0.9979 | 0.9990   | 486.0000 | 1.0000      |
| UCEC            | 0.9673    | 0.9816 | 0.9744   | 494.0000 | 0.9975      |
| <b>Accuracy</b> | 0.9577    | 0.9577 | 0.9577   | 0.0000   |             |

231

232

234 **Table 3.** Prediction probabilities of each samples on each cancer.

| Cancer          | 1      | 2      | 3      | 4      | 5      | 6      | 7      | 8      | 9      | 10     | 11     | 12     | 13     | 14   | 15   | 16     | 17     | 18     | 19     |
|-----------------|--------|--------|--------|--------|--------|--------|--------|--------|--------|--------|--------|--------|--------|------|------|--------|--------|--------|--------|
| BLCA            | 0.0005 | 0.0015 | 0.0005 | 0      | 0.1825 | 0.162  | 0.0665 | 0.0155 | 0.002  | 0.001  | 0.034  | 0      | 0      | 0    | 0    | 0.0015 | 0.0005 | 0      | 0      |
| BRCA            | 0.993  | 0.9675 | 0.9995 | 0.999  | 0.6375 | 0.1195 | 0.045  | 0.066  | 0.0015 | 0.0005 | 0.0085 | 0.001  | 0.0005 | 0    | 0    | 0      | 0      | 0      | 0      |
| CESC            | 0.0005 | 0.004  | 0      | 0      | 0.047  | 0.101  | 0.8    | 0.086  | 0.0275 | 0.002  | 0.1115 | 0      | 0      | 0    | 0    | 0.0015 | 0      | 0      | 0.001  |
| COAD            | 0      | 0.001  | 0      | 0.0005 | 0.005  | 0.01   | 0.008  | 0.002  | 0.7015 | 0.001  | 0.009  | 0      | 0      | 0    | 0    | 0.001  | 0      | 0      | 0      |
| GBM             | 0      | 0      | 0      | 0      | 0.001  | 0.0035 | 0      | 0      | 0      | 0      | 0.001  | 0      | 0      | 0    | 0    | 0      | 0.0005 | 0      | 0      |
| HNSC            | 0.0005 | 0      | 0      | 0      | 0.0065 | 0.011  | 0.0055 | 0.0015 | 0      | 0.993  | 0.754  | 0      | 0      | 0    | 0    | 0      | 0      | 0      | 0.001  |
| KIRC            | 0      | 0      | 0      | 0      | 0.0015 | 0.0535 | 0.001  | 0.003  | 0.0005 | 0      | 0.001  | 0      | 0.0005 | 0    | 0    | 0.0015 | 0.001  | 0      | 0      |
| KIRP            | 0      | 0      | 0      | 0      | 0.004  | 0.038  | 0.001  | 0.0045 | 0.0005 | 0      | 0      | 0      | 0      | 0    | 0    | 0.0005 | 0.0015 | 0      | 0      |
| LAML            | 0      | 0.006  | 0      | 0      | 0.0155 | 0.0055 | 0      | 0.005  | 0.001  | 0      | 0.0005 | 0      | 0      | 0    | 0    | 0      | 0      | 0      | 0      |
| LGG             | 0      | 0      | 0      | 0      | 0.0125 | 0.165  | 0.0055 | 0.01   | 0.0005 | 0.0005 | 0.0035 | 0      | 0      | 0    | 0    | 0.001  | 0      | 0      | 0.0005 |
| LIHC            | 0      | 0.0005 | 0      | 0      | 0.003  | 0.0365 | 0.0045 | 0.0045 | 0.0095 | 0      | 0.001  | 0      | 0      | 0    | 0    | 0      | 0      | 0      | 0      |
| LUAD            | 0.0025 | 0.006  | 0      | 0      | 0.011  | 0.0225 | 0.009  | 0.012  | 0.001  | 0      | 0.0055 | 0.0065 | 0      | 0    | 0    | 0.0025 | 0.001  | 0.001  | 0.001  |
| LUSC            | 0.001  | 0.008  | 0      | 0.0005 | 0.017  | 0.0735 | 0.0375 | 0.008  | 0      | 0      | 0.024  | 0.001  | 0.0005 | 0    | 0    | 0.0015 | 0.0005 | 0.0005 | 0.002  |
| OV              | 0      | 0      | 0      | 0      | 0.002  | 0.0005 | 0      | 0.001  | 0      | 0      | 0      | 0      | 0      | 0    | 0    | 0.002  | 0      | 0      | 0      |
| PAAD            | 0      | 0.0005 | 0      | 0      | 0.0095 | 0.0775 | 0.004  | 0.0045 | 0.0075 | 0      | 0.001  | 0      | 0      | 0    | 0    | 0.0005 | 0      | 0      | 0      |
| PRAD            | 0      | 0.0005 | 0      | 0      | 0.003  | 0.004  | 0.002  | 0.001  | 0      | 0      | 0.0005 | 0      | 0      | 0    | 0    | 0      | 0      | 0      | 0.001  |
| READ            | 0      | 0.002  | 0      | 0      | 0.0005 | 0.001  | 0.003  | 0.0005 | 0.242  | 0.0005 | 0.0065 | 0      | 0      | 0    | 0    | 0      | 0      | 0      | 0      |
| STAD            | 0      | 0      | 0      | 0      | 0.0055 | 0.0025 | 0.0005 | 0.0005 | 0.0045 | 0      | 0.004  | 0      | 0      | 0    | 0    | 0      | 0      | 0      | 0      |
| THCA            | 0      | 0      | 0      | 0      | 0.0015 | 0.0035 | 0      | 0.0065 | 0      | 0      | 0.0005 | 0.991  | 0.9985 | 1    | 1    | 0.9875 | 0.9925 | 0.9985 | 0.992  |
| UCEC            | 0.002  | 0.0025 | 0      | 0      | 0.034  | 0.1095 | 0.007  | 0.768  | 0.0005 | 0.0015 | 0.034  | 0.0005 | 0      | 0    | 0    | 0.001  | 0.0005 | 0      | 0.0015 |
| LOW_CONFIDENCE  | 0      | 0      | 0      | 0      | 0      | 0      | 0      | 0      | 0      | 0      | 0      | 0      | 0      | 0    | 0    | 0      | 0      | 0      | 0      |
| predicted_label | BRCA   | BRCA   | BRCA   | BRCA   | BRCA   | LGG    | CESC   | UCEC   | COAD   | HNSC   | HNSC   | THCA   | THCA   | THCA | THCA | THCA   | THCA   | THCA   | THCA   |
| true_label      | BRCA   | BRCA   | BRCA   | BRCA   | BRCA   | BRCA   | CESC   | CESC   | COAD   | HNSC   | HNSC   | THCA   | THCA   | THCA | THCA | THCA   | THCA   | THCA   | THCA   |
| correct         | 1      | 1      | 1      | 1      | 1      | 0      | 1      | 0      | 1      | 1      | 1      | 1      | 1      | 1    | 1    | 1      | 1      | 1      | 1      |

236 **Mean value of gene expression and somatic mutations on each cancer**

237 We plotted the heatmap of mean value of gene expression and somatic mutations on each cancer. In Fig 3,  
 238 the rows represent 74 genes of gene expression and columns denote the cancers. In Fig 4, the rows  
 239 represent 6 genes of somatic mutation and columns represent the cancers. The mean value of gene  
 240 expression and somatic mutation on a logarithmic scale was plotted with relative color. A color bar was  
 241 used to display the value difference. Cancers that fell into cluster at horizontal axis had a similar value  
 242 between gene expression or mutation number. The genes were also clustered at vertical axis based on the  
 243 similarity between cancers.

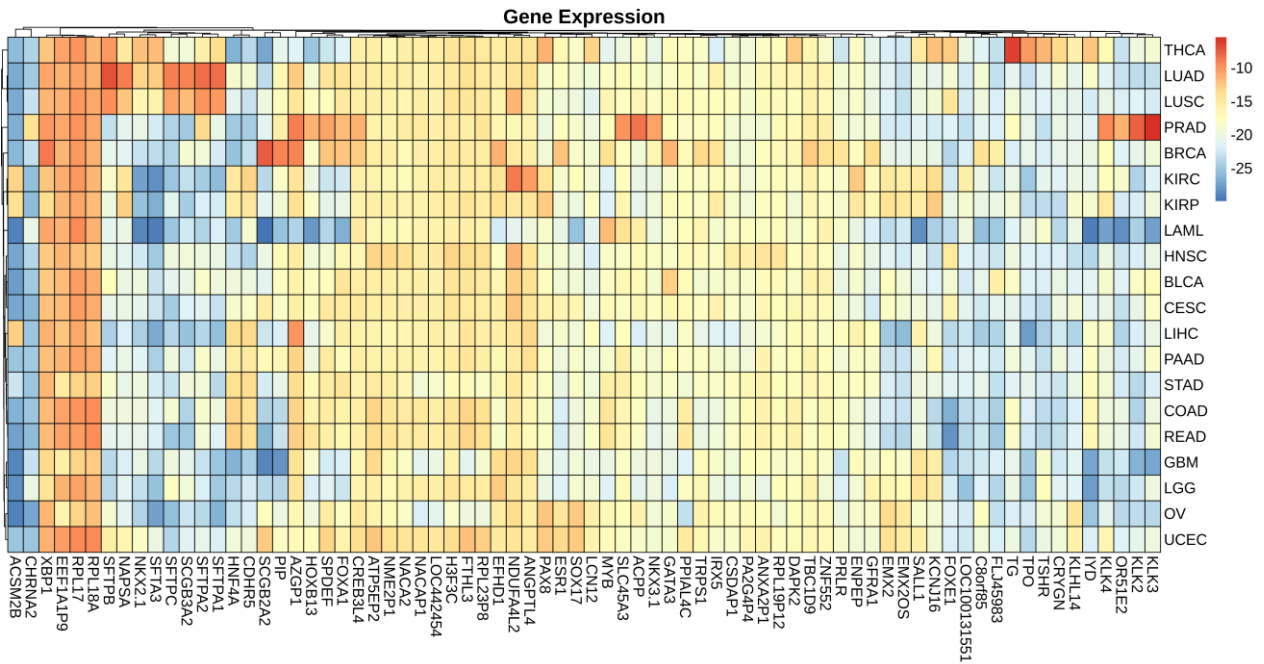

245  
246 **Fig 3.** Heatmap of mean value of gene expression on each cancer.

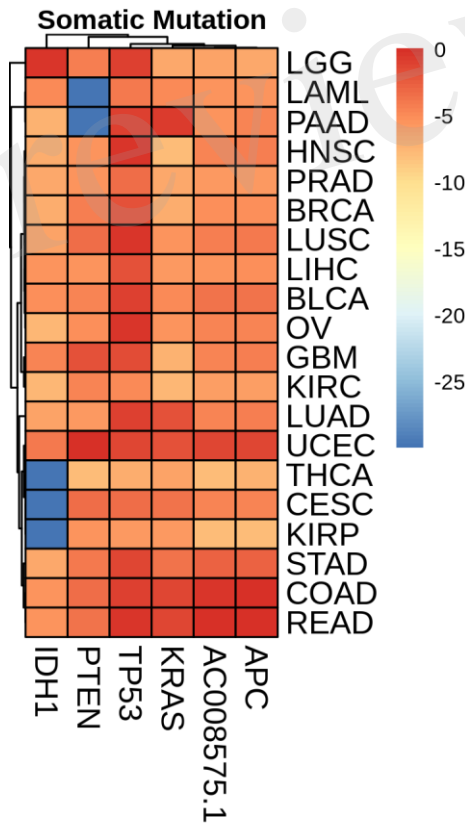

247  
248 **Fig 4.** Heatmap of mean value of somatic mutations on each cancer.

249



250 **Discussion**

251 Data of somatic mutation and gene expression profiling can be used to identify the primary site of tumors.  
252 However, it was the first time to identify the cancer tissue origin by using both data of somatic mutation  
253 and gene expression profiling. We carried out experiments by using 7008 samples with combination of  
254 data of somatic and gene expression profiling among 20 cancers. By comparing the performance of them,  
255 we obtained highest accuracy by leveraging both of the data of somatic mutation and gene expression  
256 profiling.

257 The primary analysis tool we used was random forest [35, 38], a machine learning algorithm that can  
258 be used for gene selection and tumor classification. We chose top-rank 80 genes, where 6 genes and 74  
259 genes are corresponding to mutation and expression respectively, for classification. Therefore, it showed  
260 that data of somatic mutation performs worse than gene expression profiling on prediction of cancer tissue  
261 origin. Our method obtained 96% overall accuracy on the training dataset. The performance is maintained  
262 considerably on the external cohorts, and the overall accuracy on sample with metastatic disease is 89%.  
263 Our model cannot provide good performance on physiologically proximal cancers, such as uterine corpus  
264 endometrial carcinoma and cervical squamous cell carcinoma and endocervical adenocarcinoma. The  
265 endometrial and ovarian endometrioid carcinomas evolve from similar precursor endometrial epithelial  
266 cells; many researches are involved in the molecular pathogenesis of the endometrial and ovarian  
267 endometrioid carcinomas[45].

268

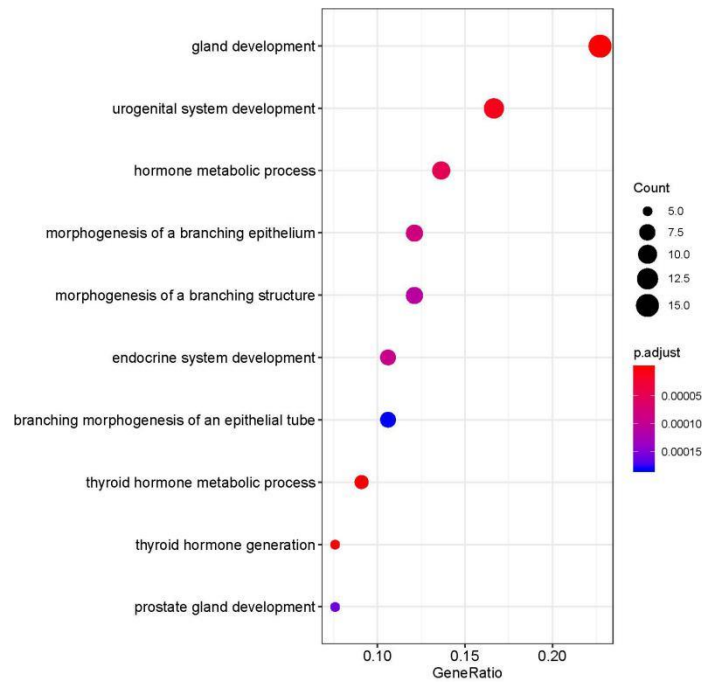

269  
 270 **Fig 5.** Selected top-rank 80 genes enriched in cellular component, biological process and molecular  
 271 function.

272  
 273 We studied the role that gene plays in cellular component, biological process and molecular function.  
 274 Fig 5 shows the top-rank 80 genes selected by random forest algorithm. The selected genes were enriched  
 275 in hormone metabolic process, tissue and organ development and hormone-mediated signaling pathway,  
 276 specifically in gland development, urogenital system development, hormone metabolic process,  
 277 morphogenesis of a branching epithelium, morphogenesis of a branching structure, endocrine system  
 278 development, branching morphogenesis of an epithelial tube, thyroid hormone metabolic process, thyroid  
 279 hormone generation and prostate gland development. For example, *APC* plays a significant role in  
 280 discovering pathogenesis of soft tissue tumors[46]. Birnbaum et al investigated what role the *APC* gene  
 281 play in colorectal cancer, at the investigation of 183 colon adenocarcinomas, point mutations were found in  
 282 73% of cases[47]. We obtained the similar conclusion that mutation of *APC* gene may be the important  
 283 impact of colorectal cancer, as heatmap shown in Fig 4 that the mean number of *APC* gene mutation in  
 284 colorectal cancer is more than that in other cancers except rectum adenocarcinoma. It can be explained that  
 285 they are two physiologically proximal cancers. Mutation in *IDH1* gene can reduce cell survival,  
 286 proliferation and invasion of human glioma [48]. Mutation in *IDH1* gene is an oncogenic driver in a  
 287 majority of lower-grade gliomas and have an impact on brain lower grade glioma with different genetic  
 288 pathway [49-51]. The same conclusion was acquired in Fig 4 that the mean number of *IDH1* gene mutation

289 in Brain lower grade glioma is more than that in other cancers.

290 *ACPP* gene plays a vital key in prostate adenocarcinoma [52-54]. From the heatmap, it is clear that  
291 the level of *ACPP* gene expression in prostate adenocarcinoma is higher than that in other cancers. The  
292 expression levels of *TG* were found to be altered in all kinds of thyroid carcinomas [55]. From Fig 3, we  
293 obtained similar results that the level of *TG* gene expression in thyroid carcinomas is higher than that in  
294 other cancers.

295 Molecular profiling of tissue-specific genes can be utilized to identify the primary site of tumor.  
296 Combination of data of somatic mutation and gene expression profiling were first proposed in this study to  
297 predict the primary origin. We obtained considerable prediction performance, and therefore this research  
298 can bring great help to the identification of cancer tissue origin. However, we did not carry out research to  
299 discover the relationship between data of gene expression and somatic mutation. Our method cannot  
300 classify physiologically proximal cancers yet. And it is also a future work to employing other machine  
301 learning algorithms that can improve the classification performance.

## 302 **Conclusion**

303 Identification of cancer tissue origin is a challenging work recently and in the future. With a lot of  
304 molecular profiling available, we can make use of them alone and combine some of them to improve  
305 performance of identification primary site of tumor. Machine learning algorithm is also an effective tool to  
306 help classifying the cancers. The prediction performance can be tremendously affected by the number of  
307 features used.

308 In this study, we used both molecular data of somatic mutation and gene expression profiling to  
309 generate a feature matrix. Then the optimal number of genes was obtained and the data was trained, based  
310 on random forest algorithm. The performance of using our method was also compared to only by using  
311 data of somatic mutation or gene expression profiling. Our method achieved highest accuracy. Experiment  
312 results shows that our method can be an effective tool for primary origin tracing.

## 313 **Conflict of Interest**

314 Author BW, JL, XL, QL, GT and JY were employed by the company Geneis Beijing Co., Ltd. The  
315 remaining authors declare that the research was conducted in the absence of any commercial or financial

316 relationships that could be construed as a potential conflict of interest

## 317 **Authors' contributions**

318 JY, GT and PB conceived the concept of the work. BH, XL, BW and JL performed the experiments. BH  
319 and XL wrote the paper. QL, WG and JH reviewed the paper. All authors approved the final version of this  
320 manuscript.

## 321 **Acknowledgement**

322 This research was funded by Hunan Provincial Innovation Platform and Talents Program (No.  
323 2018RS3105), the Natural Science Foundation of China (No. 61803151), the Natural Science Foundation  
324 of Hunan province (No. 2018JJ3570), and the Project of Scientific Research Fund of Hunan Provincial  
325 Education Department (No 19A060 and 19C0185).

## 326 **Reference**

- 327 1. Shaw, P.H.S., et al., *A Clinical Review of the Investigation and Management of Carcinoma of Unknown*  
328 *Primary in a Single Cancer Network*. Clinical Oncology, 2007. **19**(1): p. 87-95.
- 329 2. Rizwan, M. and M. Zulfiqar, *Carcinoma of unknown primary*. JPMA. The Journal of the Pakistan Medical  
330 Association, 2010. **60**(1): p. 598-9.
- 331 3. Kurahashi, I., et al., *A microarray-based gene expression analysis to identify diagnostic biomarkers for*  
332 *unknown primary cancer*. PLoS One, 2013. **8**(5): p. e63249.
- 333 4. Hyphantis, T., et al., *Psychiatric manifestations, personality traits and health-related quality of life in*  
334 *cancer of unknown primary site*. Psychooncology, 2013. **22**(9): p. 2009-15.
- 335 5. Hudis, C.A., *Trastuzumab--mechanism of action and use in clinical practice*. N Engl J Med, 2007.  
336 **357**(1): p. 39-51.
- 337 6. Varadhachary, G.R., et al., *Carcinoma of unknown primary with a colon-cancer profile-changing*  
338 *paradigm and emerging definitions*. Lancet Oncol, 2008. **9**(6): p. 596-9.
- 339 7. Janick, S., et al., *Immunohistochemistry for Diagnosis of Metastatic Carcinomas of Unknown Primary*  
340 *Site*. Cancers, 2018. **10**(4): p. 108-110.
- 341 8. Kandalaft, P.L. and A.M. Gown, *Practical Applications in Immunohistochemistry: Carcinomas of*  
342 *Unknown Primary Site*. Archives of Pathology & Laboratory Medicine, 2015. **140**(6): p. 508-526.
- 343 9. Centeno, B.A., et al., *Hybrid Model Integrating Immunohistochemistry and Expression Profiling for the*  
344 *Classification of Carcinomas of Unknown Primary Site*. Journal of Molecular Diagnostics, 2010. **12**(4): p.  
345 476-486.
- 346 10. Voigt, J.J., *Immunohistochemistry: a major progress in the classification of carcinoma of unknown*  
347 *primary*. 2008. **10**(12): p. 693-697.
- 348 11. Huebner, G., et al., *503 POSTER Comparative analysis of microarray testing and immunohistochemistry*

- 349 *in patients with carcinoma of unknown primary – CUP syndrome*. 2007. **5**(4): p. 90-91.
- 350 12. Fu, Z., et al., *Diagnosis of Primary Clear Cell Carcinoma of the Vagina by 18F-FDG PET/CT*. Clinical  
351 Nuclear Medicine, 2019. **44**(4): p. 493-494.
- 352 13. Kwee, T.C., et al., *FDG PET/CT in carcinoma of unknown primary*. European Journal of Nuclear  
353 Medicine and Molecular Imaging, 2010. **37**(3): p. 635-644.
- 354 14. Fencel, P., et al., *Prognostic and diagnostic accuracy of [18F]FDG-PET/CT in 190 patients with carcinoma  
355 of unknown primary*. European Journal of Nuclear Medicine and Molecular Imaging, 2007. **34**(11): p.  
356 1783-1792.
- 357 15. Ambrosini, V., et al., *18F-FDG PET/CT in the assessment of carcinoma of unknown primary origin*. La  
358 Radiologia medica, 2006. **111**(8): p. 1146-1155.
- 359 16. Oien, K.A. and J.L. Dennis, *Diagnostic work-up of carcinoma of unknown primary: from  
360 immunohistochemistry to molecular profiling*. Annals of Oncology, 2012. **23**(suppl\_10): p. x271-x277.
- 361 17. Li, Y., et al., *A comprehensive genomic pan-cancer classification using The Cancer Genome Atlas gene  
362 expression data*. BMC Genomics, 2017. **18**(1): p. 508-512.
- 363 18. Hoadley, K.A., et al., *Multiplatform Analysis of 12 Cancer Types Reveals Molecular Classification within  
364 and across Tissues of Origin*. Cell, 2014. **158**(4): p. 929-944.
- 365 19. Küsters-Vandeveld, H.V.N., et al., *Copy number variation analysis and methylome profiling of a  
366 GNAQ-mutant primary meningeal melanocytic tumor and its liver metastasis*. Experimental &  
367 Molecular Pathology, 2017. **102**(1): p. 25-31.
- 368 20. Beroukhi, R., et al., *Assessing the significance of chromosomal aberrations in cancer: Methodology  
369 and application to glioma*. Proceedings of the National Academy of Sciences of the United States of  
370 America, 2007. **104**(50): p. 20007-20012.
- 371 21. Baudis, M., *Genomic imbalances in 5918 malignant epithelial tumors: an explorative meta-analysis of  
372 chromosomal CGH data*. 2007. **7**(1): p. 226-0.
- 373 22. Sheffield, B.S., et al., *Personalized oncogenomics in the management of gastrointestinal  
374 carcinomas-early experiences from a pilot study*. Current Oncology, 2016. **23**(6): p. 68-73.
- 375 23. Marquard, A.M., et al., *TumorTracer: a method to identify the tissue of origin from the somatic  
376 mutations of a tumor specimen*. BMC Medical Genomics, 2016. **8**(1): p. 58-59.
- 377 24. Lawrence, M.S., et al., *Discovery and saturation analysis of cancer genes across 21 tumour types*.  
378 Nature, 2014. **505**(7484): p. 495-501.
- 379 25. Dietlein, F. and W. Eschner, *Inferring primary tumor sites from mutation spectra: a meta-analysis of  
380 histology-specific aberrations in cancer-derived cell lines*. Human Molecular Genetics, 2014. **23**(6): p.  
381 1527-1537.
- 382 26. Qu, K.Z., et al., *Molecular identification of carcinoma of unknown primary (CUP) with gene expression  
383 profiling*. Journal of Clinical Oncology, 2007.
- 384 27. Erlander, M.G., et al., *Molecular classification of carcinoma of unknown primary by gene expression  
385 profiling from formalin-fixed paraffin-embedded tissues*. 2004. **22**(14\_suppl): p. 9545.
- 386 28. Hainsworth, J.D., et al., *Molecular Gene Expression Profiling to Predict the Tissue of Origin and Direct  
387 Site-Specific Therapy in Patients With Carcinoma of Unknown Primary Site: A Prospective Trial of the  
388 Sarah Cannon Research Institute*. Journal of Clinical Oncology, 2013. **31**(2): p. 217-223.
- 389 29. Gross-Goupil, M., et al., *Identifying the Primary Site Using Gene Expression Profiling in Patients with  
390 Carcinoma of an Unknown Primary (CUP): A Feasibility Study from the GEFCAPI*. Onkologie, 2012.  
391 **35**(1-2): p. 54-55.
- 392 30. Greco and F. A., *Cancer of Unknown Primary or Unrecognized Adnexal Skin Primary Carcinoma?  
393 Limitations of Gene Expression Profiling Diagnosis*. Journal of Clinical Oncology, 2013. **31**(11): p.

- 394 1479-1481.
- 395 31. Erlander, M.G., et al., *Performance and Clinical Evaluation of the 92-Gene Real-Time PCR Assay for*  
396 *Tumor Classification*. Journal of Molecular Diagnostics Jmd, 2011. **13**(5): p. 493-503.
- 397 32. Rosenwald, S., et al., *Validation of a microRNA-based qRT-PCR test for accurate identification of*  
398 *tumor tissue origin*. Mod Pathol, 2010. **23**(6): p. 814-23.
- 399 33. Bloom, G., et al., *Multi-platform, multi-site, microarray-based human tumor classification*. Am J Pathol,  
400 2004. **164**(1): p. 9-16.
- 401 34. Kao, K.J., S.H. Cheng, and A.T. Huang, *Gene expression profiling for prediction of distant metastasis*  
402 *and survival in primary nasopharyngeal carcinoma*. 2006. **24**(18\_suppl).
- 403 35. Sandri, M. and P. Zuccolotto. *Variable Selection Using Random Forests*. in *Data Analysis, Classification*  
404 *and the Forward Search*. 2006. Berlin, Heidelberg: Springer Berlin Heidelberg.
- 405 36. R, M. and R. Rohini, *LASSO: A feature selection technique in predictive modeling for machine learning*.  
406 2016, 2016 IEEE International Conference on Advances in Computer Applications (ICACA): Rohini, R.
- 407 37. Malhi, A. and R. Gao, *PCA-Based Feature Selection Scheme for Machine Defect Classification*.  
408 Instrumentation and Measurement, IEEE Transactions on, 2005. **53**(26): p. 1517-1525.
- 409 38. Breiman, L., *Random Forests*. Machine Learning, 2001. **45**(1): p. 5-32.
- 410 39. Meyer, J.G., et al., *Learning Drug Function from Chemical Structure with Convolutional Neural*  
411 *Networks and Random Forests*. Journal of Chemical Information and Modeling, 2019.
- 412 40. Waardenberg, A.J., et al., *Erratum to: 'CompGO: an R package for comparing and visualizing Gene*  
413 *Ontology enrichment differences between DNA binding experiments'*. BMC Bioinformatics, 2016.  
414 **17**(1): p. 179-185.
- 415 41. Ye, J., et al., *WEGO: a web tool for plotting GO annotations*. Nucleic acids research, 2006. **34**(12): p.  
416 293-312.
- 417 42. Nota, B., *Gogadget: An R Package for Interpretation and Visualization of GO Enrichment Results*.  
418 Molecular informatics, 2016. **36**.
- 419 43. Yu, G., et al., *clusterProfiler: an R Package for Comparing Biological Themes Among Gene Clusters*.  
420 Omics : a journal of integrative biology, 2012. **16**: p. 284-7.
- 421 44. Ma, X.J., et al., *Molecular classification of human cancers using a 92-gene real-time quantitative*  
422 *polymerase chain reaction assay*. Arch Pathol Lab Med, 2006. **130**(4): p. 465-73.
- 423 45. Melissa K McConechy, J.D., Janine Senz, Winnie Yang, Nataliya Melnyk, Alicia A Tone, Leah M Prentice,  
424 Kimberly C Wiegand, Jessica N McAlpine, Sohrab P Shah, Cheng-Han Lee, Paul J Goodfellow, C Blake  
425 Gilks & David G Huntsman *Ovarian and endometrial endometrioid carcinomas have distinct CTNNB1*  
426 *and PTEN mutation profiles*. Modern Pathology, 2014. **27**(1): p. 128-134.
- 427 46. Kuhnen, C., et al., *APC and  $\beta$ -catenin in alveolar soft part sarcoma (ASPS) - immunohistochemical and*  
428 *molecular genetic analysis*. Pathology - Research and Practice, 2000. **196**(5): p. 0-304.
- 429 47. Birnbaum, D.J., et al., *Expression Profiles in Stage II Colon Cancer According to APC Gene Status*.  
430 Translational Oncology, 2012. **5**(2): p. 72-76.
- 431 48. Cui, D., et al., *R132H mutation in IDH1 gene reduces proliferation, cell survival and invasion of human*  
432 *glioma by downregulating Wnt/ $\beta$ -catenin signaling*. The International Journal of Biochemistry & Cell  
433 Biology, 2016. **73**(2): p. 72-81.
- 434 49. Pieper, R.O., S. Ohba, and J. Mukherjee, *MUTANT IDH1-DRIVEN CELLULAR TRANSFORMATION*  
435 *INCREASES RAD51-MEDIATED HOMOLOGOUS RECOMBINATION AND TEMOZOLOMIDE (TMZ)*  
436 *RESISTANCE*. Cancer research, 2014. **74**(17): p. 4836-44.
- 437 50. Ohno, M., et al., *Secondary glioblastomas with IDH1/2 mutations have longer glioma history from*  
438 *preceding lower-grade gliomas*. Brain Tumor Pathology, 2013. **30**(4): p. 224-232.

- 439 51. Ohka, F., et al., *A novel all-in-one intraoperative genotyping system for IDH1-mutant glioma*. Brain  
440 Tumor Pathology, 2017. **34**(2): p. 91-97.
- 441 52. Vihko, P.T., et al., *Prostatic acid phosphatase (PAP) is PI(3)P-phosphatase and its inactivation leads to*  
442 *change of cell polarity and invasive prostate cancer*. Cancer Research, 2005. **65**(10): p. 62-78.
- 443 53. Maatman, T.J., M.K. Gupta, and J.E. Montie, *The Role of Serum Prostatic Acid Phosphatase as a Tumor*  
444 *Marker in Men with Advanced Adenocarcinoma of the Prostate*. Journal of Urology, 1984. **132**(1): p.  
445 58-60.
- 446 54. Drago, J.R., et al., *Relative value of prostate-specific antigen and prostatic acid phosphatase in*  
447 *diagnosis and management of adenocarcinoma of prostate Ohio State University Experience*. Urology,  
448 1989. **34**(4): p. 187-192.
- 449 55. Makhlof, A.M., et al., *Identification of CHEK1, SLC26A4, c-KIT, TPO and TG as new biomarkers for*  
450 *human follicular thyroid carcinoma*. Oncotarget, 2016. **7**(29): p. 45776-45788.
- 451

In review
